# Supplementary material
Source: PubMed Central journal article supplement (PMC4074304)
Supplement: supp_138.24.5357_DEV065565FigS2.pdf [file supp_138.24.5357_DEV065565FigS2.pdf]

A

Base genome: Mouse May 2004    Chromosome: chr5 74,479,092-74,823,886

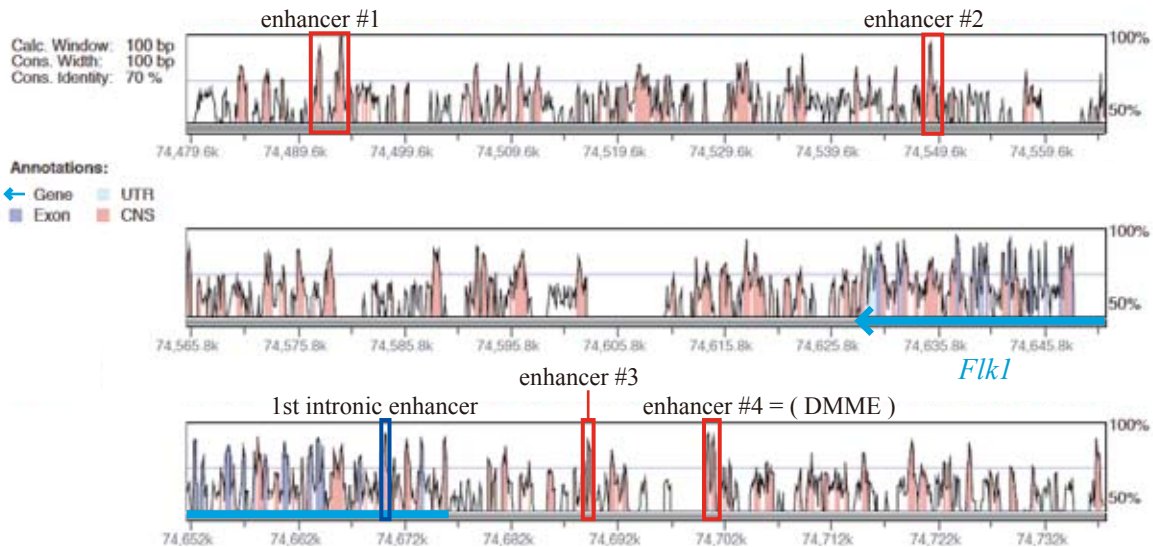

B

enhancer #1-LacZ

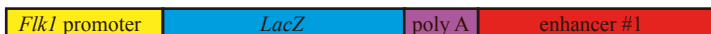

enhancer #2-LacZ

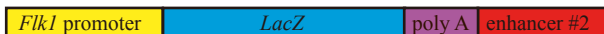

enhancer #3-LacZ

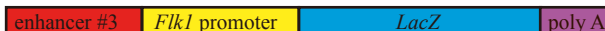

enhancer #4-LacZ

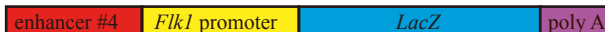

= DMME
