# Supplementary material
Source: PubMed Central journal article supplement (PMC4074304)
Supplement: supp_138.24.5357_DEV065565FigS4.pdf [file supp_138.24.5357_DEV065565FigS4.pdf]

A

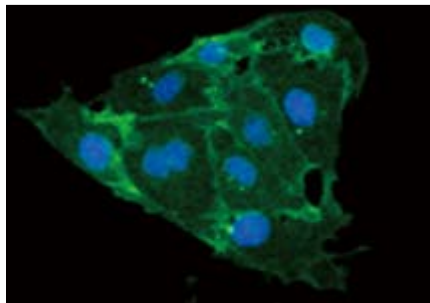

PECAM1 /Hoechst

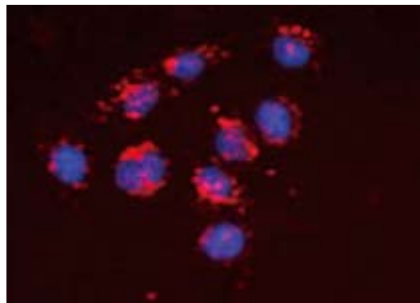

DiI-Ac-LDL /Hoechst

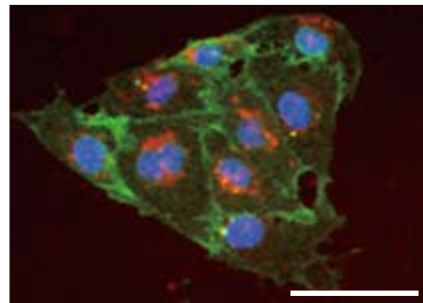

PECAM1/DiI-Ac-LDL/Hoechst

B

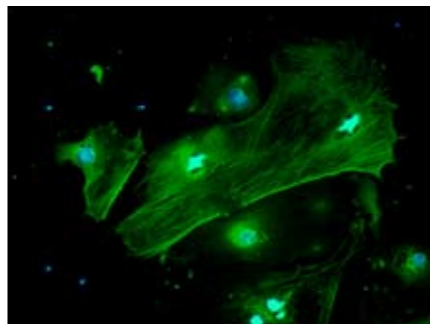

DESMIN /Hoechst

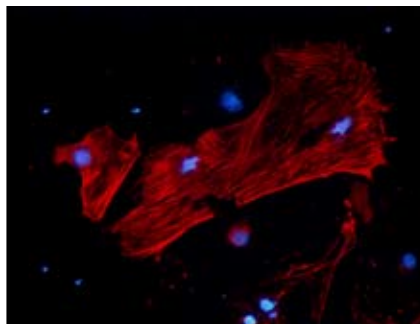

SMA /Hoechst

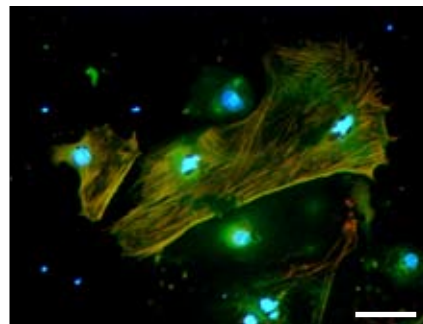

DESMIN /SMA /Hoechst
