# Supplementary material
Source: PubMed Central journal article supplement (PMC4074304)

A

```

TGAACTGTCTTCAGCCCGTACACTTTCTAGGATAAAAATATTTATCTGGATTGCAAAATCATT
TCCTGTCGTTCTGAGATCAAGCACCATCTTGACGTGTAACATGCGTCTCTGTCCGCCCGAG
CAACTTAGAGGGCACCAATTCAGGTTCCCTCCGATGGTGGCCAGGAAGAGGCCCAATAAAT
ATTTCAAACATAAAAGGATTGTTCTAACAAAGGGGGTTTTAAATCCCCCTGGGTTATCTGAA
CAGCTTCCGTTTATTTTGGTTTTACCTCTACCCTCACAACGGGAAAAGTCTTTTCTTCTTC
TTCTTCTTCTTTTTTTTCCA AAACAAAACACAGATTTACACAGATGTGGGTTGAGATTGAAA
AAAAAAAAATGATCGACAACAGGAAC CACATCGGCAAGCAAGAGGAGACCTTGTAACAAA
GACACAGATATTAAGTGAGAGAAATACATTGCTCTAAGAAACCAATCTGAGTCCAGGCCAGC
CTGGATAATCCCTTTTGAGGATCCCGGTCTGATAGCAAGCAATCTTTCCTCAATGACAACCT
CCATGTAGCTGTGTTATAAACACAAACCTATCAGAGCACACATTACACACACCTTACTGTGAC
ATGGCAAATGGTGTCTGGCATCCTAGATAAGCTTTATGGAGAGTGAAGAGGAGGAGACAAAA
GAAGTAGGTGAGAGACCCAGAAAAACACTTCCCTGAGTCCTTTGATGTAGCCAG

```

→ Flk1 enhancer1 Forward tgaactgtcttcagcccgta

← Flk1 enhancer1 Reverse tgggtcttgatctcagaacg

Positive control / Flk1 promoter -174 ~ 81 from TSS of Flk1 gene

Forward ttgctctcagatcgacttg

Reverse ccaactggataccaggttgg

Negative control primers were used to detect mouse genomic DNA in an ORF-free intergenic region on Chromosome 6 from SABiosciences

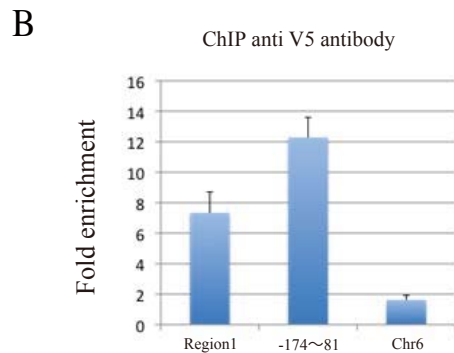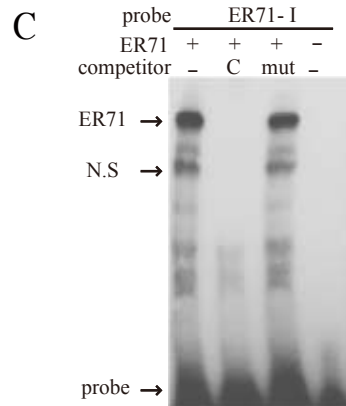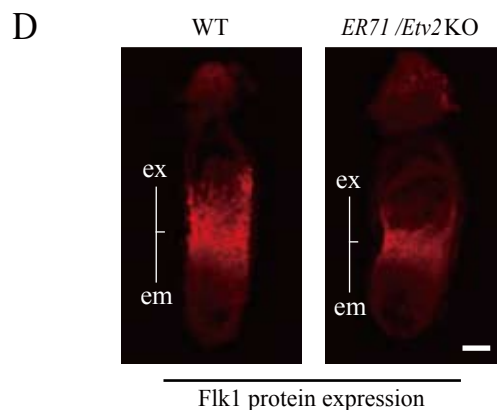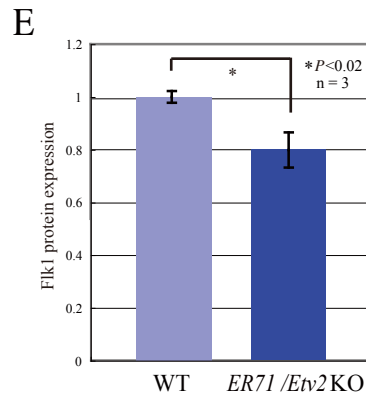

Supplement: supp_138.24.5357_DEV065565FigS6.pdf [file supp_138.24.5357_DEV065565FigS6.pdf]
