# Supplementary material
Source: PubMed Central journal article supplement (PMC4074304)
Supplement: supp_138.24.5357_DEV065565TableS1.pdf [file supp_138.24.5357_DEV065565TableS1.pdf]

**Table S1. Summary of the protein-binding activity**

| <b>Gata4</b> |       |      | <b>Cdx2</b> |       |      | <b>Tcf4</b> |     |      |
|--------------|-------|------|-------------|-------|------|-------------|-----|------|
| BS           | Pr    | BA   | BS          | Pr    | BA   | BS          | Pr  | BA   |
| Gata I       | G1/C1 | ++++ | Cdx I       | G1/C1 | +    | Tcf/Lef I   | TL1 | +    |
| Gata II      | G2/C2 | +++  | Cdx II      | G2/C2 | +    | Tcf/Lef II  | TL2 | ++++ |
| Gata III     | G3    | +++  | Cdx III     | F1/C3 | +    |             |     |      |
| Gata IV      | G4    | +++  | Cdx IV      | F2/C4 | ++++ |             |     |      |
| Gata V       | G5    | +++  | Cdx V       | C5    | +    |             |     |      |
| Gata VI      | G6    | +++  | Cdx VI      | G7/C6 | +++  |             |     |      |
| Gata VII     | G7/C6 | ++++ |             |       |      |             |     |      |
| <b>Lef1</b>  |       |      |             |       |      |             |     |      |
| BS           | Pr    | BA   |             |       |      |             |     |      |
| Tcf/Lef I    | TL1   | +    |             |       |      |             |     |      |
| Tcf/Lef II   | TL2   | ++++ |             |       |      |             |     |      |

Protein-binding activities to each binding site were determined by EMSA using recombinant proteins and binding sites within enhancer #4. The results are summarized as follows: +++, strong; +, high; ++, moderate; +, weak; -, none. BA, binding activity; BS, binding site; Pr, probe.
