# Supplementary material
Source: PubMed Central journal article supplement (PMC4074304)
Supplement: supp_138.24.5357_DEV065565TableS2.pdf [file supp_138.24.5357_DEV065565TableS2.pdf]

**Table S2. Summary of transgenic mice lines**

| Transgene construct  | 7.5 dpc embryo |    | 8.5 dpc embryo |    |    |    |
|----------------------|----------------|----|----------------|----|----|----|
|                      | lm             | ee | bi             | ec | pm | ee |
| Enhancer #4 711-lacZ | +              | -  | -              | -  | +  | -  |
| Enhancer #4 724-lacZ | +              | -  | -              | -  | +  | -  |
| Enhancer #4 728-lacZ | -              | -  | -              | -  | ND | -  |
| Enhancer #4 732-lacZ | +              | -  | -              | -  | +  | -  |
| Enhancer #4 741-lacZ | +              | -  | -              | -  | ND | -  |
| Enhancer #4 32-GFP   | +              | -  | -              | -  | +  | -  |
| Enhancer #4 402-GFP  | +              | -  | ND             | ND | ND | ND |
| Enhancer #4 408-GFP  | +              | -  | ND             | ND | ND | ND |
| Enhancer #4 410-GFP  | +              | -  | ND             | ND | ND | ND |
| Enhancer #4 823-GFP  | +              | -  | ND             | ND | ND | ND |
| Enhancer #4 854-GFP  | +              | -  | ND             | ND | ND | ND |
| Enhancer #4 859-GFP  | +              | -  | ND             | ND | ND | ND |

bi, blood island; ec, endothelial cell; ee, ectopic expression; lm, lateral mesoderm; ND, not determined; pm, posterior mesoderm.
