# Supplementary material
Source: PubMed Central journal article supplement (PMC4074304)

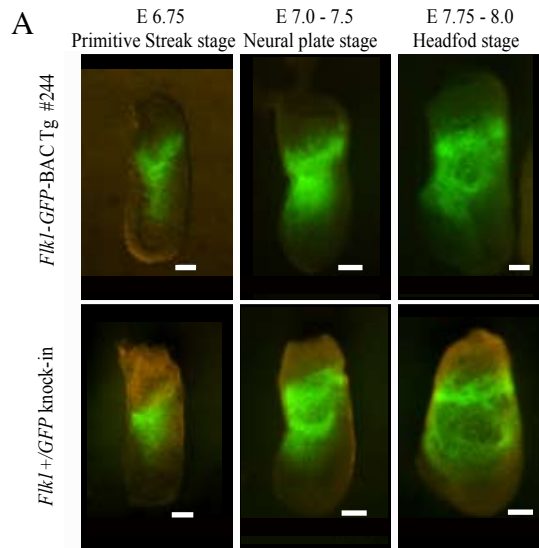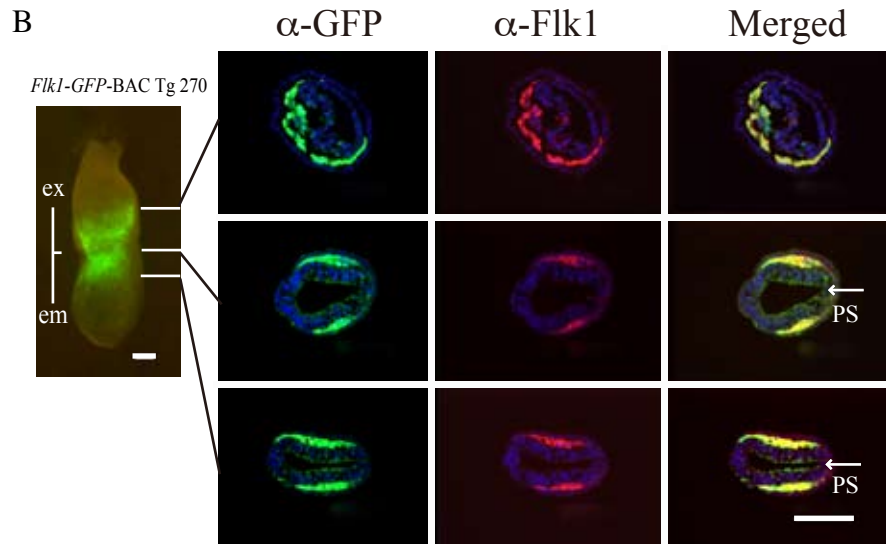

Supplement: supp_138.24.5357_DEV065565FigS1.pdf [file supp_138.24.5357_DEV065565FigS1.pdf]

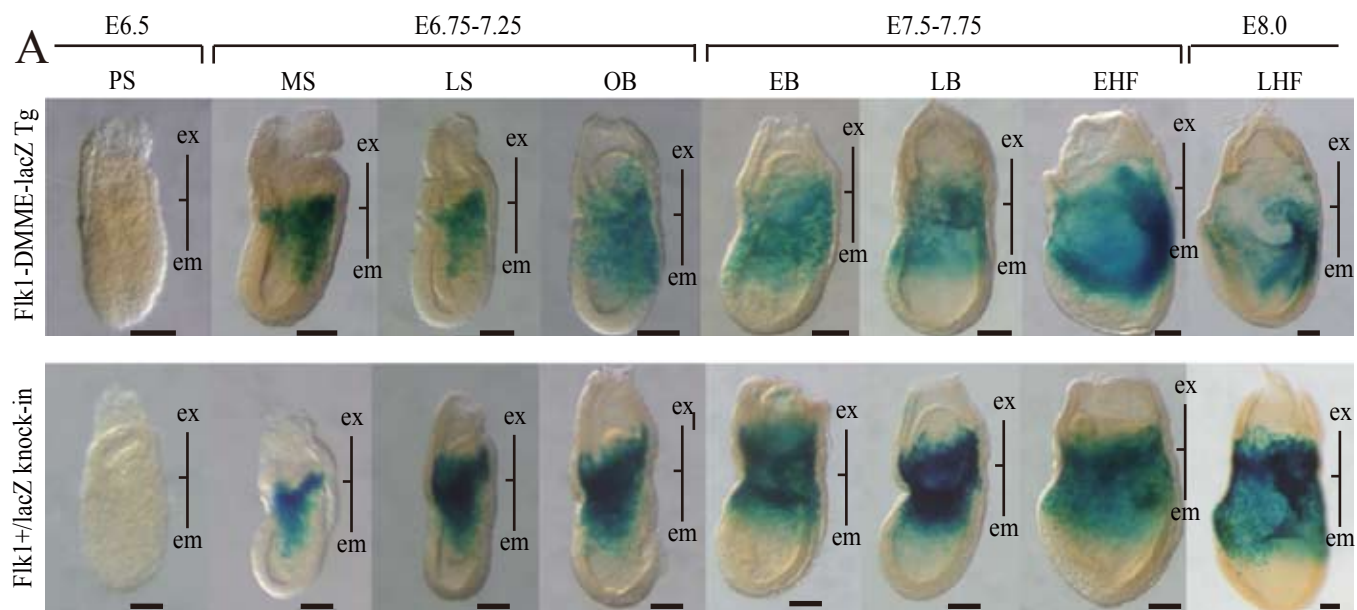

**B**

Flk1-DMME-GFP Tg (#32) LS-OB (E7.0)

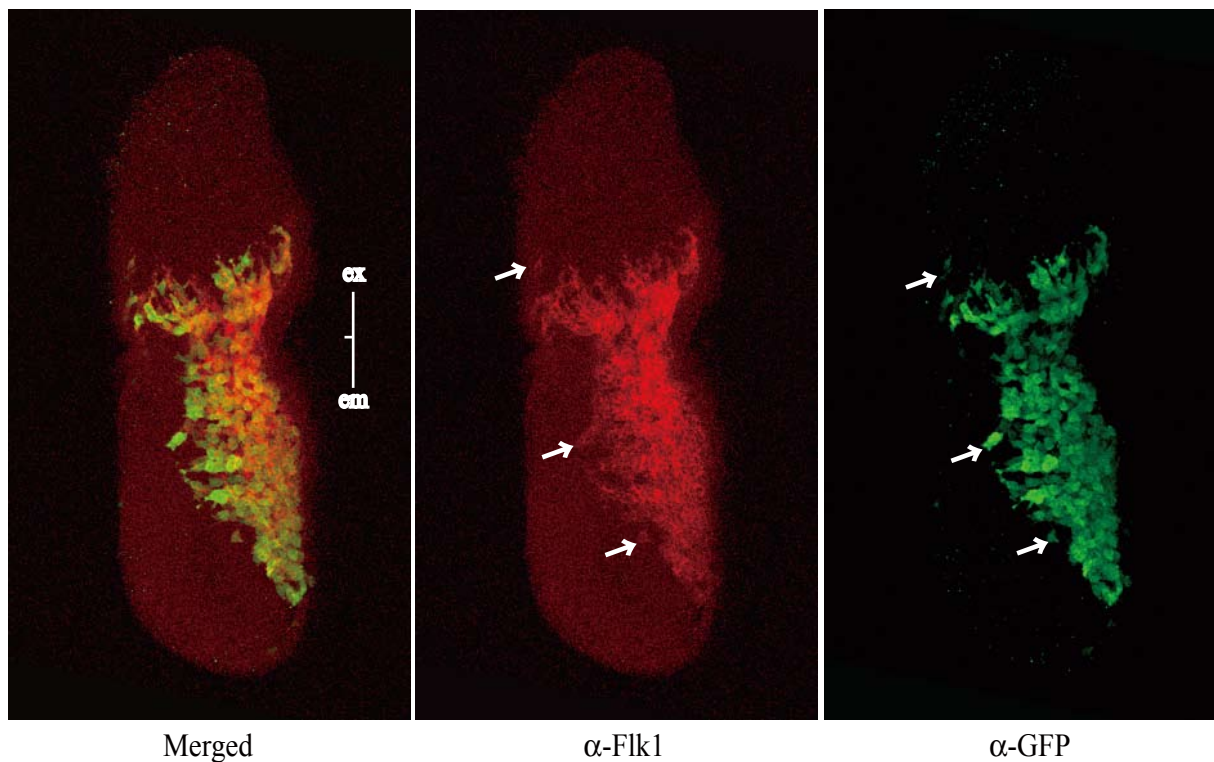

Supplement: supp_138.24.5357_DEV065565FigS3.pdf [file supp_138.24.5357_DEV065565FigS3.pdf]

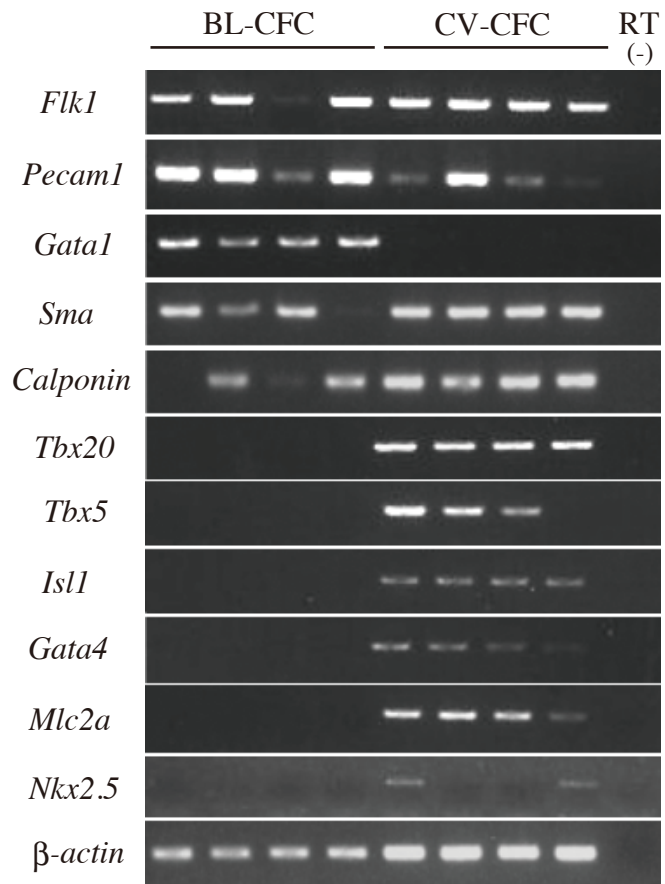

Supplement: supp_138.24.5357_DEV065565FigS5.pdf [file supp_138.24.5357_DEV065565FigS5.pdf]
